# Supplementary material for: Intra- and Intermonomer Interactions Are Required to Synergistically Facilitate ATP Hydrolysis in Hsp90
Source: PubMed Central journal article supplement — J Biol Chem. 2008 Jul 25;283(30):21170–8. doi: 10.1074/jbc.M800046200 (PMC2475720; doi:10.1074/jbc.m800046200), 2008-07-25
Supplement: supp_283_30_21170__1.pdf [file supp_283_30_21170__1.pdf]

## Christian N. Cunningham

---

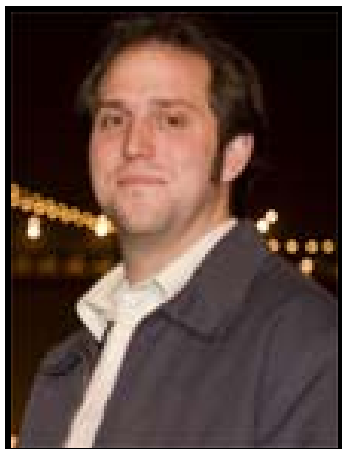

I began my career as a scientist studying alternative methods for the crystallization of membrane proteins in the lab of Robert Glaeser at UC Berkeley. Heading to graduate school, I became enamored with the idea of trying to understand the principles of protein folding and the accessory proteins that aid in this process. From that point on, my research in graduate school has been focused on uncovering the mechanism of the molecular chaperone Hsp90 and trying to understand its unique role within the larger network of cellular chaperones.

**Current Position:** 5th year Graduate Student in the Graduate Group in the Biophysics Program at the University of California, San Francisco

**Education:** B.A. in Biochemistry and Molecular Biology (2002) from the University of California, Berkeley

**Non-scientific Interests:** Music promotion and production, sailing, cooking

---

**Read Christian Cunningham's article entitled:** Intra- and Intermonomer Interactions Are Required to Synergistically Facilitate ATP Hydrolysis in Hsp90

<http://www.jbc.org/cgi/content/full/283/30/21170>
